# Supplementary material for: Global total precipitable water variations and trends during 1958–2021
Source: Copernicus journal article supplement (doi:10.5194/hess-2023-301), 2024-01-10
Supplement: Supplementary file 1 [file hess-2023-301-supplement.pdf]

- 1 *Supplement of*
- 2 **Global total precipitable water variations and trends during 1958-2021**
- 3 Nenghan Wan et al.
- 4 *Correspondence to:* Xiaomao Lin ([xlin@ksu.edu](mailto:xlin@ksu.edu))

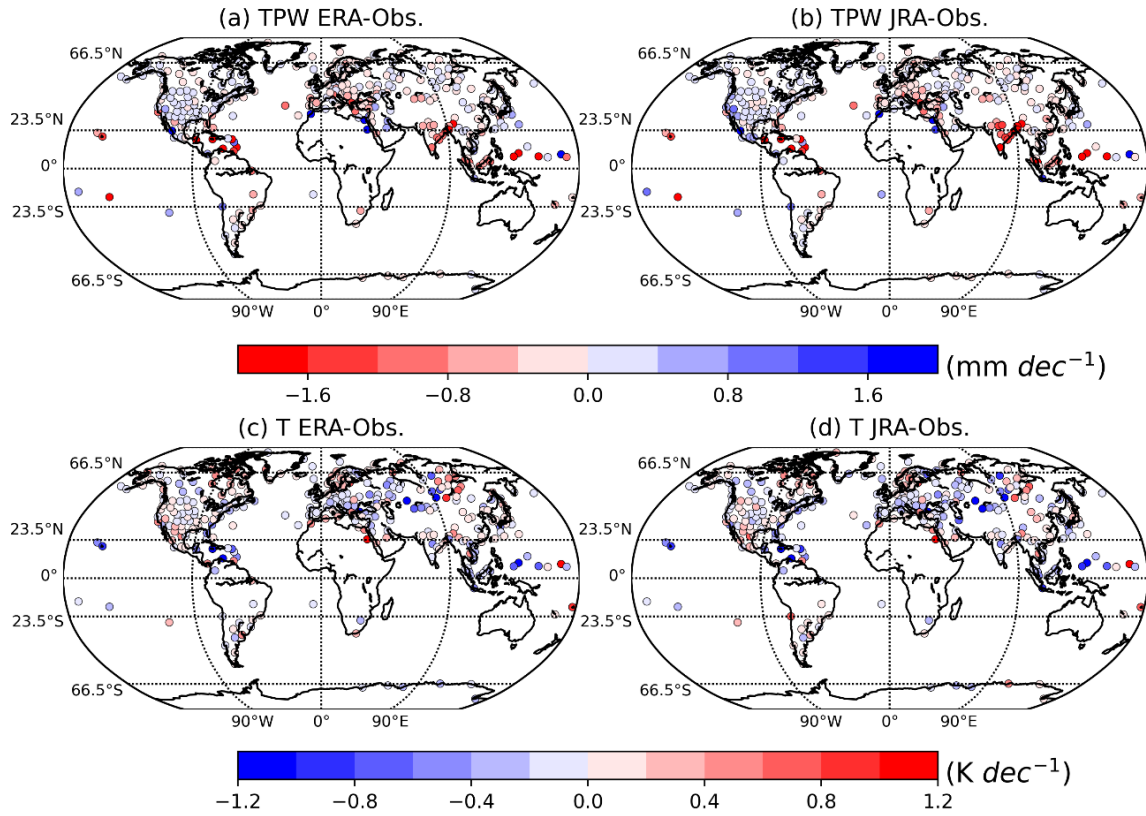

6

7

8

9

**Figure S1.** Trend comparisons with radiosondes: (a-b) TPW trends' difference (mm dec<sup>-1</sup>) between radiosonde observations and ERA5 and JRA-55 from 1979-2019. (c-d) Same as (a-b) but for temperature trends' difference (K dec<sup>-1</sup>). A total of 331 radiosonde observations were used in the analysis.

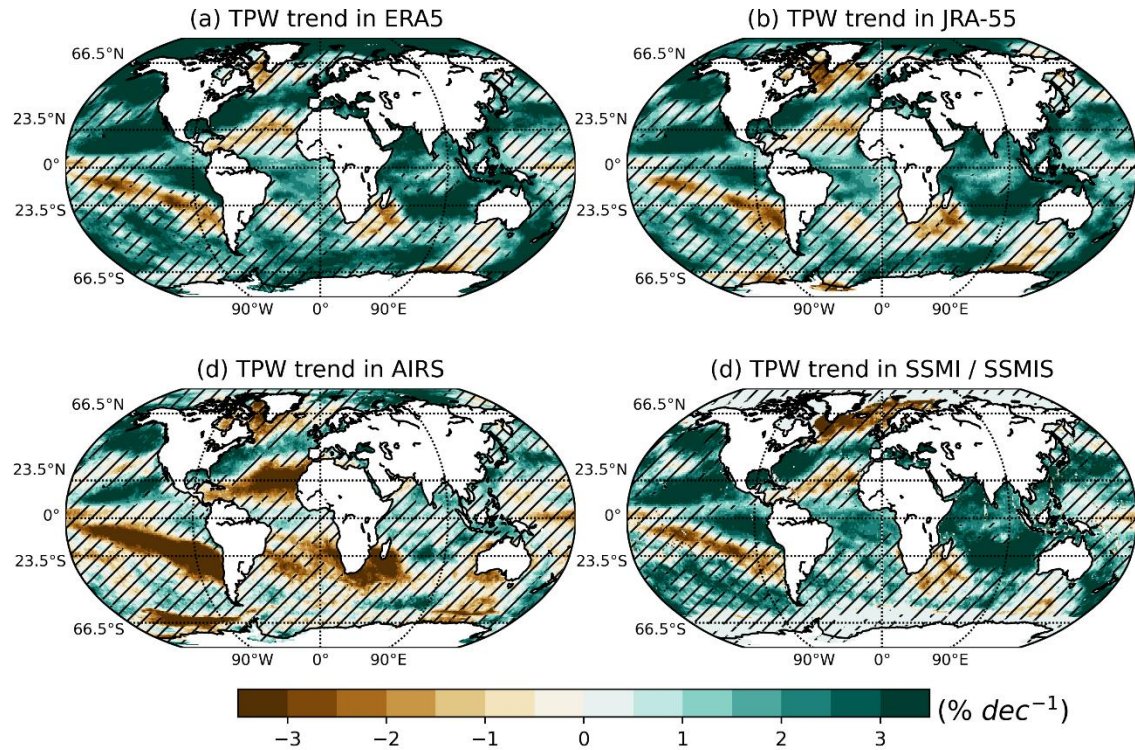

10  
11  
12  
13

**Figure S2.** Trend comparisons with satellite observations from 2003-2021: Total precipitable water (TPW) trends over oceans for (a) ERA5, (b) JRA-55, (c) AIRS satellite, and (d) SSMI satellite. The hatch areas represent trends that are not significant at a 95% confidence level.

14 **Table S1.** Discontinuity positions of TPW in ERA5 and JRA-55 during 1958-2021 over regions, and  
 15 coincident changes in the observing systems that might be used in the assimilation.

| Dataset        | Regions        | TPW                |                  |                                                                                                      |
|----------------|----------------|--------------------|------------------|------------------------------------------------------------------------------------------------------|
|                |                | Dates<br>(yyyy-mm) | Stepsize<br>(mm) | Detected Discontinuities*                                                                            |
| ERA5           | Land           | 1991-07            | -0.43            | Approx. discontinuity position detected when changing assimilation data from HIRS NOAA-10 to NOAA-12 |
|                |                | 1997-09            | 0.65             | /                                                                                                    |
|                |                | 1999-02            | 0.65             | Approx. discontinuity position detected when changing assimilation data from NOAA-12 to NOAA-11      |
|                | Ocean          | 1977-01            | -0.81            | Approx. discontinuity position detected when changing assimilation data from DMSP14 SSMI to 15       |
|                |                | 2001-06            | 0.66             | /                                                                                                    |
|                |                | 2009-06            | 0.51             | Approx. discontinuity position detected when assimilation of METEOSAT 7 GEOS data                    |
|                |                | 2015-05            | 0.36             | Approx. end of DMSP 13 and the start of assimilation of DMSP 17 SSMI                                 |
|                | North American | 1977-03            | 0.59             | Approx. discontinuity position detected when assimilation of multiple satellites e.g., AMSR-2, CRIS  |
|                |                | 2014-07            | -0.53            | /                                                                                                    |
|                | JRA-55         | Land               | 1991-07          | 0.60                                                                                                 |
| Tropical land  |                | 1972-02            | -0.50            | /                                                                                                    |
|                |                | 1982-06            | 0.86             | /                                                                                                    |
|                |                | 1991-06            | -1.46            | /                                                                                                    |
|                |                | 1997-09            | 0.85             | /                                                                                                    |
|                |                | 1999-02            | 0.93             | /                                                                                                    |
| NH polar       |                | 1960-09            | -1.18            | /                                                                                                    |
|                |                | 2003-07            | -0.38            | Approx. discontinuity position detected when assimilation of AMSU and MHS satellite in Jun. 2003     |
| North American |                | 1963-11            | 0.31             | /                                                                                                    |

16 \* These discontinuity points are matched if the difference between metadata events and discontinuities  
 17 detected was within  $\pm 3$  months. The metadata events were taken from references (Hersbach et al., 2020;  
 18 Kobayashi et al., 2015).

19 **Table S2.** Dates of discontinuities of  $T_{2m}$  in ERA5 and JRA-55 during 1958-2021 over specific regions, and  
 20 coincident changes in the observing system or changes of the input to the assimilation system.

| Dataset        | Region         | $T_{2m}$           |                                                                |                                                                                        |
|----------------|----------------|--------------------|----------------------------------------------------------------|----------------------------------------------------------------------------------------|
|                |                | Dates<br>(yyyy-mm) | Stepsize<br>(K)                                                | Detected Discontinuities*                                                              |
| ERA5           | Land           | 1963-11            | -0.39                                                          | /                                                                                      |
|                |                | 1973-12            | -0.22                                                          | Approx. discontinuity position detected after assimilation of DROP Sonde               |
|                | Ocean          | 1964-02            | -0.18                                                          | /                                                                                      |
|                | North American | 1963-11            | -0.54                                                          | /                                                                                      |
|                | Tropical land  | 1973-09            | -0.38                                                          | Approx. discontinuity position detected after assimilation of DROP Sonde               |
|                | NH polar       | 2004-12            | 1.05                                                           | Approx. discontinuity position detected after assimilation of METEOSAT 8 GEOS          |
| JRA-55         | Land           | 1973-10            | -0.35                                                          | /                                                                                      |
|                | Ocean          | 1978-11            | 0.17                                                           | Approx. discontinuity position detected after end assimilation of use VTPR in Feb 1979 |
|                |                | 2015-07            | 0.21                                                           | /                                                                                      |
|                | Tropical land  | 1960-12            | -0.40                                                          | /                                                                                      |
|                |                | 1973-03            | -0.52                                                          | Approx. discontinuity position detected after assimilation of VTPR in Jan 1973         |
|                |                | 1976-10            | 0.38                                                           | /                                                                                      |
|                | NH polar       | 1962-08            | -0.90                                                          | /                                                                                      |
|                |                | 2004-12            | 0.95                                                           | Approx. discontinuity position detected after end assimilation of SSM/I in Dec 2004    |
| North American | 1997-11        | 0.61               | Approx. discontinuity position detected after TMI in Feb. 1998 |                                                                                        |

21 \* These discontinuity points are matched if the difference between metadata events and discontinuities  
 22 detected was within  $\pm 3$  months. The metadata events were taken from references (Hersbach et al., 2020;  
 23 Kobayashi et al., 2015).

24  
25

**Table S3.** Dates of discontinuities of  $T_s$  in ERA5 and JRA-55 during 1958-2021 over regions, and coincident changes in the observing system or changes of the input to the assimilation.

| Dataset | Region         | $T_s$              |                 |                                                                                         |
|---------|----------------|--------------------|-----------------|-----------------------------------------------------------------------------------------|
|         |                | Dates<br>(yyyy-mm) | Stepsize<br>(K) | Detected Discontinuities*                                                               |
| ERA5    | Land           | 1963-11            | -0.50           | /                                                                                       |
|         |                | 1973-12            | -0.34           | Approx. discontinuity position detected after assimilation of DROP Sonde                |
|         | Ocean          | 1970-05            | -0.19           | /                                                                                       |
|         | North American | 1964-02            | -0.57           | /                                                                                       |
|         | Tropical land  | 1970-06            | -0.47           | /                                                                                       |
|         | NH polar       | 2004-12            | 1.11            | Approx. discontinuity position detected after assimilation of METEOSAT 8 GEOS           |
| JRA-55  | Land           | 1971-01            | -0.52           | /                                                                                       |
|         | Ocean          | 1963-12            | -0.17           | /                                                                                       |
|         | Tropical land  | 1978-11            | -0.66           | Approx. discontinuity position detected after assimilation of HIRS and SSU in Nov. 1978 |
|         |                | 1976-07            | -0.15           | /                                                                                       |
|         | North American | 1997-10            | 0.51            | Approx. discontinuity position detected after assimilation of TMI in Feb. 1998          |

26  
27  
28

\* These discontinuity points are matched if the difference between metadata events and discontinuities detected was within  $\pm 3$  months. The metadata events were taken from references (Hersbach et al., 2020; Kobayashi et al., 2015).

29 **Table S4.** Trends of TPW,  $T_{2m}$ ,  $T_s$  calculated on raw and adjusted time series and their difference during  
 30 1958-2021 over regions.

| Dataset | Regions        | TPW trend (mm dec <sup>-1</sup> ) |       |       | $T_{2m}$ trend (K dec <sup>-1</sup> ) |      |       | $T_s$ trend (K dec <sup>-1</sup> ) |      |       |
|---------|----------------|-----------------------------------|-------|-------|---------------------------------------|------|-------|------------------------------------|------|-------|
|         |                | raw                               | adj.  | diff. | raw                                   | adj. | diff. | raw                                | adj. | diff. |
| ERA5    | NH polar       | 0.11                              | 0.11  | 0.00* | 0.44                                  | 0.33 | -0.11 | 0.48                               | 0.36 | -0.11 |
|         | Land           | 0.17                              | 0.29  | 0.13  | 0.25                                  | 0.31 | 0.06  | 0.24                               | 0.38 | 0.14  |
|         | North American | 0.17                              | -0.01 | -0.18 | 0.28                                  | 0.31 | 0.04  | 0.25                               | 0.27 | 0.02  |
|         | Ocean          | 0.15                              | -0.18 | -0.33 | 0.13                                  | 0.13 | 0.00  | 0.11                               | 0.14 | 0.03  |
|         | Tropical land  | 0.29                              | 0.29  | 0.00* | 0.21                                  | 0.27 | 0.06  | 0.16                               | 0.22 | 0.07  |
| JRA-55  | NH polar       | 0.12                              | 0.09  | -0.03 | 0.47                                  | 0.42 | -0.04 | 0.50                               | 0.50 | 0.00* |
|         | Land           | 0.19                              | 0.31  | 0.12  | 0.23                                  | 0.31 | 0.08  | 0.20                               | 0.30 | 0.10  |
|         | North American | 0.21                              | 0.25  | 0.04  | 0.23                                  | 0.13 | -0.11 | 0.21                               | 0.14 | -0.07 |
|         | Ocean          | 0.22                              | 0.22  | 0.00* | 0.10                                  | 0.05 | -0.05 | 0.11                               | 0.12 | 0.01  |
|         | Tropical land  | 0.38                              | 0.80  | 0.42  | 0.16                                  | 0.19 | 0.03  | 0.13                               | 0.14 | 0.01  |

31 \*represents there were no discontinuities detected.

32  
 33 **References**

34 Hersbach, H., Bell, B., Berrisford, P., Hirahara, S., Horányi, A., Muñoz-Sabater, J., Nicolas, J., Peubey, C.,  
 35 Radu, R., Schepers, D., Simmons, A., Soci, C., Abdalla, S., Abellan, X., Balsamo, G., Bechtold, P.,  
 36 Biavati, G., Bidlot, J., Bonavita, M., De Chiara, G., Dahlgren, P., Dee, D., Diamantakis, M., Dragani, R.,  
 37 Flemming, J., Forbes, R., Fuentes, M., Geer, A., Haimberger, L., Healy, S., Hogan, R. J., Hólm, E.,  
 38 Janisková, M., Keeley, S., Laloyaux, P., Lopez, P., Lupu, C., Radnoti, G., de Rosnay, P., Rozum, I.,  
 39 Vamborg, F., Villaume, S., and Thépaut, J.-N.: The ERA5 global reanalysis, *Q. J. R. Meteorol. Soc.*,  
 40 146, 1999–2049, <https://doi.org/10.1002/qj.3803>, 2020.  
 41 Kobayashi, S., Ota, Y., Harada, Y., Ebata, A., Moriya, M., Onoda, H., Onogi, K., Kamahori, H., Kobayashi,  
 42 C., Endo, H., Miyaoka, K., and Takahashi, K.: The JRA-55 Reanalysis: General Specifications and  
 43 Basic Characteristics, *J. Meteorol. Soc. Japan*, 93, 5–48, <https://doi.org/10.2151/jmsj.2015-001>, 2015.
